# Supplementary material
Source: PubMed Central journal article supplement (PMC5339083)
Supplement: mmc1.pdf [file mmc1.pdf]

The American Journal of Human Genetics, Volume 100

## Supplemental Data

### **Somatic *MAP2K1* Mutations Are Associated with Extracranial Arteriovenous Malformation**

**Javier A. Couto, August Y. Huang, Dennis J. Konczyk, Jeremy A. Goss, Steven J. Fishman, John B. Mulliken, Matthew L. Warman, and Arin K. Greene**

Table S1. ddPCR Assays Developed for *Q56P*, *K57N*, *F53L*, *D67Y* MAP2K1 Mutations

| <b>Product</b> | <b>Assay</b>                                      |
|----------------|---------------------------------------------------|
| Forward Primer | 5'-GTATTGACTTGTGCTCCCCAC-3'                       |
| Reverse Primer | 5'-CCTGTTAATCAAGGCAAACCTCACCT-3'                  |
| REF Probe      | 5'-/5HEX/CCACCTTCTGCTTCTGGGTAAGAAAGGC/3IABkFQ/-3' |
| F53L Probe     | 5'-/56-FAM/AGCAAGGCCTCAAGGCGCTT/3IABkFQ/-3'       |
| Q56P Probe     | 5'-/56-FAM/TCTCCACCTTCTGCTTCGGGGTA/3IABkFQ/-3'    |
| K57N Probe     | 5'-/56-FAM/CAGTTCTCCACCTTCTGATTCTGGGT/3IABkFQ/-3' |
| D67Y Probe     | 5'-/56-FAM/AGTAGTCATCCTTCAGTTCTCCACCT/3IABkFQ/-3' |
